# Supplementary material
Source: publisher site journal article supplement (https://www.spandidos-publications.com/7423/downloadSupplementary)
Supplement: Supplementary file 1 [file downloadSupplementary]

Table SI. Clinical characteristics of patients with relapsed sensitive small-cell lung cancer in this study.

| Characteristic                        | Total (n=164) | TMZ group (n=20) | Patients without TMZ treatment (n=144) | P-value |
|---------------------------------------|---------------|------------------|----------------------------------------|---------|
| Age, years                            | 58.62±0.6564  | 56.33±1.308      | 58.96±0.7247                           | 0.1834  |
| Sex                                   |               |                  |                                        | 0.5955  |
| Female                                | 42 (25.61)    | 6 (30.0)         | 36 (25.0)                              |         |
| Male                                  | 122 (74.39)   | 14 (70.0)        | 108 (75.0)                             |         |
| Cigarette consumption >30 years       | 248 (46.95)   | 8 (40.0)         | 69 (47.92)                             | 0.6341  |
| Regular alcohol consumption >20 years | 46 (28.05)    | 6 (30.0)         | 40 (27.78)                             | 0.7963  |
| Diabetes mellitus                     | 13 (7.927)    | 2 (10.0)         | 11 (7.639)                             | 0.6613  |
| Hypertension                          | 21 (12.80)    | 1 (5.0)          | 20 (13.89)                             | 0.4746  |
| Family history of cancer              | 20 (12.20)    | 4 (20.0)         | 16 (11.11)                             | 0.2731  |
| Surgery                               | 10 (6.098)    | 0 (0.0)          | 10 (6.944)                             | NA      |
| Radiotherapy                          | 133 (81.10)   | 19 (95.0)        | 114 (79.17)                            | 0.1273  |
| Chemotherapy                          | 164 (100.0)   | 20 (100.0)       | 144 (100.0)                            | NA      |
| Chemo/radiotherapy                    | 133 (81.10)   | 19 (95.0)        | 114 (79.17)                            | 0.1273  |
| Incidence of brain metastasis         | 144 (87.80)   | 20 (100.0)       | 20 (18.89)                             | <0.001  |
| Overall survival, months              | 33.99±2.925   | 25.80±2.769      | 35.15±3.307                            | 0.2932  |

Values are expressed as the mean ± standard error or n (%). NA, not available; TMZ, temozolomide.

Table SII. Data of mutation status of genes related with temozolomide resistance in patients with SCLC and GBM from online analysis.

| Gene  | SCLC<br>(n=249) | GBM (n=520) |
|-------|-----------------|-------------|
| MGMT  | 0 (0)           | 3 (0.6)     |
| APEX1 | 13 (5.2)        | 1 (0.2)     |
| STAT3 | 5 (2.0)         | 3 (0.6)     |
| BCRP1 | 4 (1.6)         | 6 (1.2)     |
| PARP1 | 3 (1.2)         | 3 (0.6)     |
| TP53  | 181 (72.7)      | 159 (30.6)  |
| TTN   | 117 (47.0)      | 101 (19.4)  |
| PTEN  | 17 (6.8)        | 168 (32.3)  |
| EGFR  | 15 (6.0)        | 110 (21.2)  |
| RB1   | 138 (55.4)      | 48 (9.2)    |

The analysis was performed through cBioPortal (<http://www.cbioportal.org/>). SCLC, small-cell lung cancer; GBM, glioblastoma; TMZ, temozolomide.
